# Supplementary material
Source: PubMed Central journal article supplement (PMC8328963)

657 Supplementary Figure 1

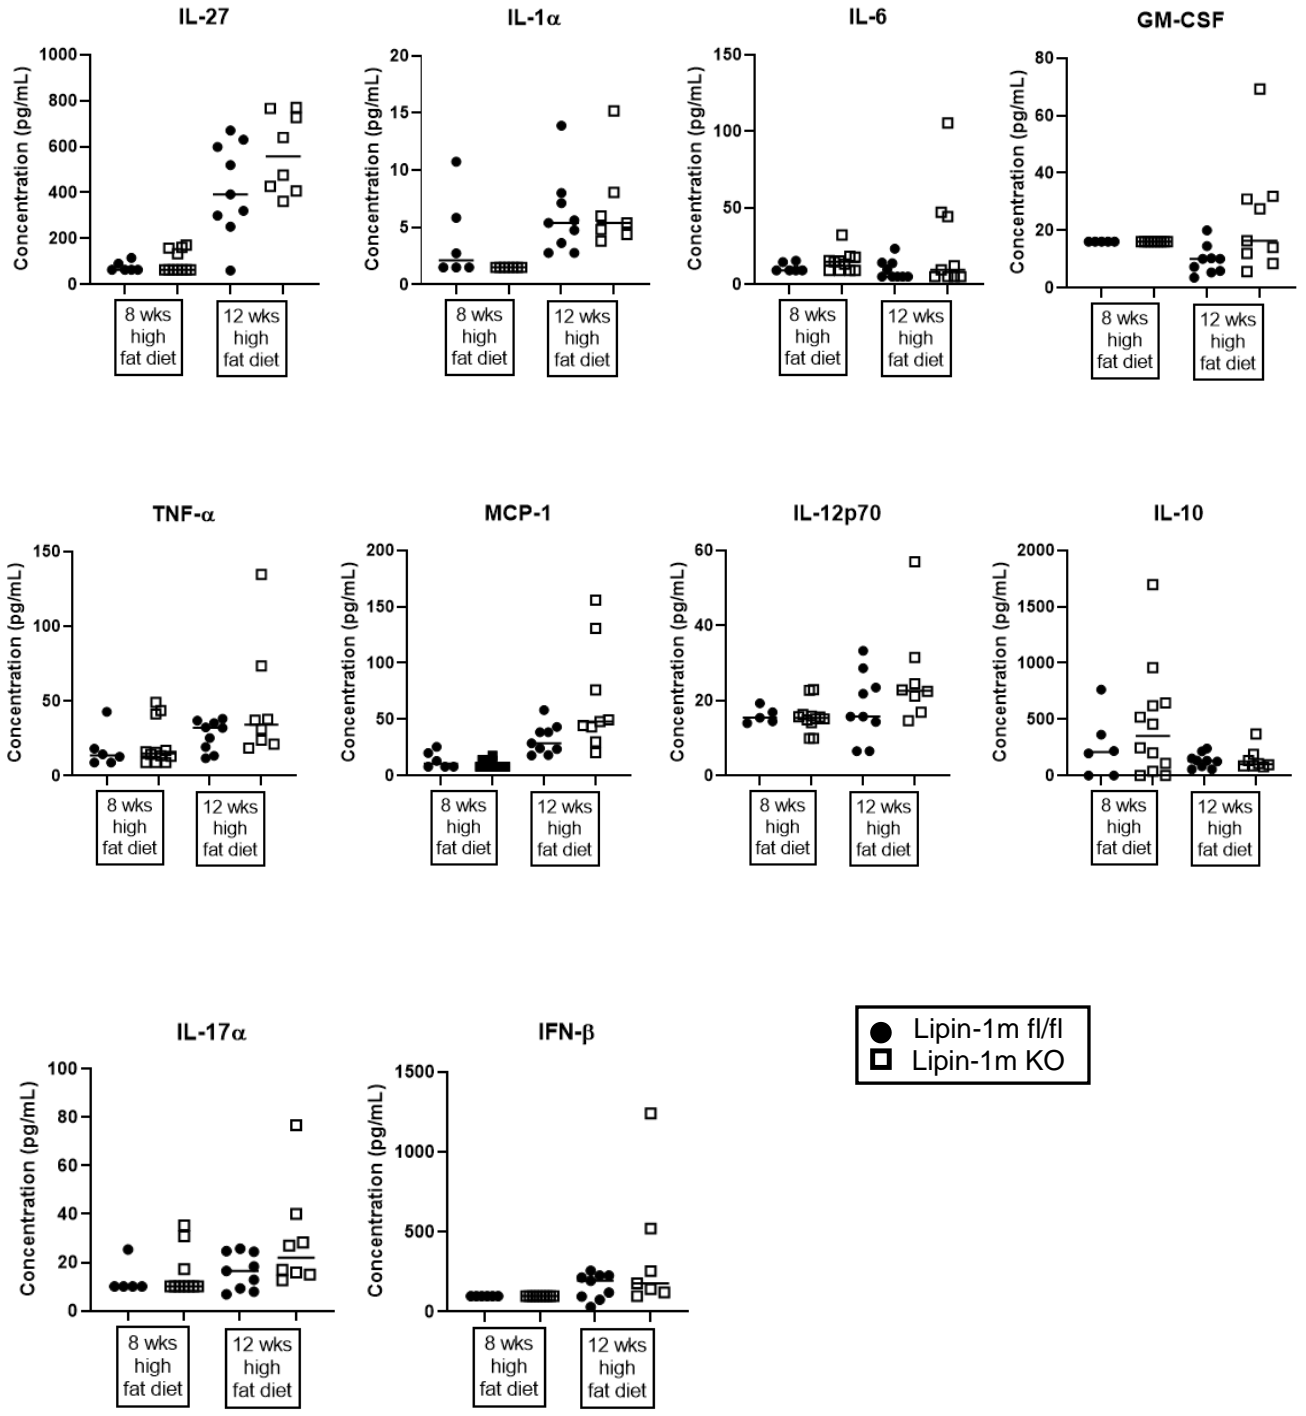

665 Supplementary Figure 2:

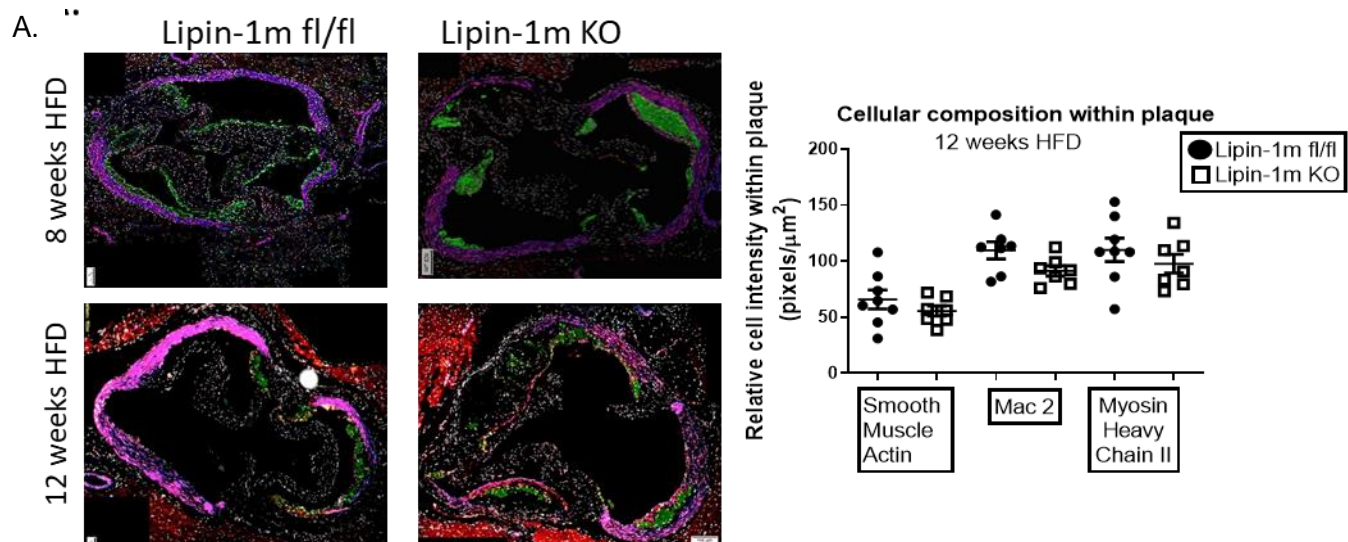

666

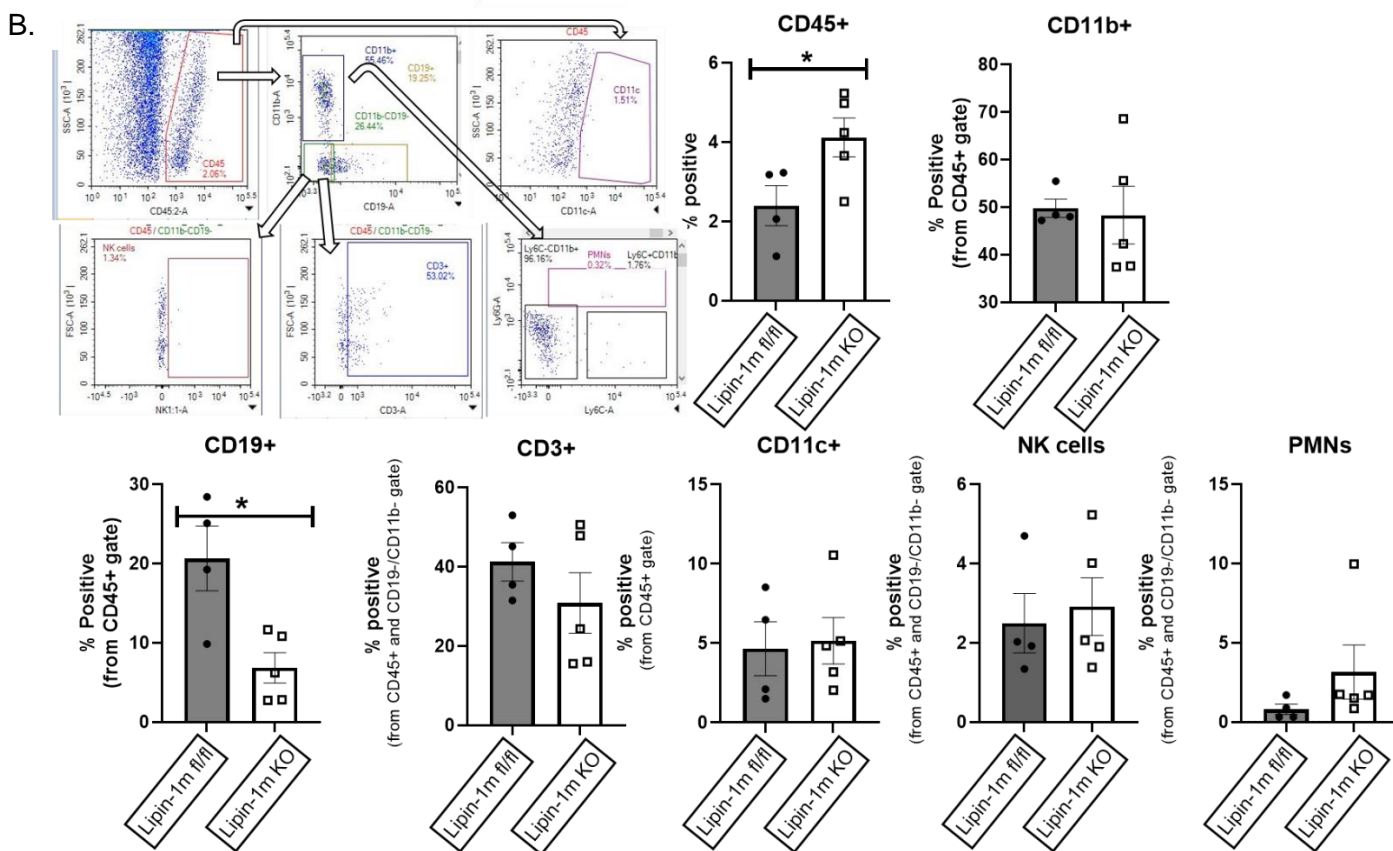

667

Supplement: NIHMS1725528-supplement-1.pdf [file NIHMS1725528-supplement-1.pdf]
